# Supplementary material for: Track-dependency of tropical cyclone risk in South Korea
Source: Copernicus journal article supplement (doi:10.5194/nhess-2017-366), 2017-10-25
Supplement: Supplementary file 1 [file nhess-2017-366-supplement.pdf]

## Supplemental Tables and Figures to “Track-dependency of tropical cyclone risk in South Korea” (Nam et al.)

**Supplementary Table 1: Description of decision tree model variables – the diagnosis (target) variable and attribute (input) variables.** Use column indicates the decision trees that use each variable; both means both of best-track based model (BT) and in-situ observation based model (IS) adopt the variable.

|                   | Variables                    | Use  | Description                                                                                                                                             | Category                                                 |
|-------------------|------------------------------|------|---------------------------------------------------------------------------------------------------------------------------------------------------------|----------------------------------------------------------|
| <b>Diagnosis</b>  | <b>Damage</b>                | Both | If the TC has recorded any property loss to the province                                                                                                | Yes or No                                                |
|                   | <b>Province</b>              | Both | Five provinces in South Korea. Two North-western, one south-western, one north-eastern and one south-eastern provinces                                  | Gyeong-gi, Gang-won, Chung-cheong, Jolla and Gyeong-sang |
|                   | <b>Track-group</b>           | BT   | Track pattern groups divided in to four through fuzzy c-means clustering method.                                                                        | East-short, East-long, West-long, or West-short          |
|                   | <b>BT radius</b>             | BT   | The longest radius of 30 knot winds or greater of the TC making landfall to South Korea from RSMC best-track (BT) data                                  | Continuous                                               |
|                   | <b>BT maxwind</b>            | BT   | Maximum sustained wind speed of the TC making landfall to South Korea from BT data                                                                      | Continuous                                               |
|                   | <b>BT pressure</b>           | BT   | Central pressure of the TC making landfall to South Korea from BT data                                                                                  | Continuous                                               |
|                   | <b>Station maxwind</b>       | IS   | The maximum value among daily maximum sustained wind speed (10 minutes) from all stations in the province and all daily data in the TC influence period | Continuous                                               |
| <b>Attributes</b> | <b>Station precipitation</b> | IS   | The maximum value among daily accumulated precipitation data from all stations in the province and all daily data in the TC influence period            | Continuous                                               |

**Supplementary Table 2: Damage record availability by track-pattern groups and provinces.** Unavailable damage records are cases that have influence duration longer than five days or overlap of more than two TCs in the period. National-undamaged cases are those who have no property loss from any of the provinces.

| Track groups       |                      |           | East-short | East-long | West-long | West-short | Sum |
|--------------------|----------------------|-----------|------------|-----------|-----------|------------|-----|
| <b>All</b>         |                      |           | 22         | 31        | 16        | 16         | 85  |
| <b>Unavailable</b> |                      |           | 1          | 3         | 4         | 6          | 14  |
| <b>Available</b>   | National             | All       | 21         | 28        | 12        | 10         | 71  |
|                    |                      | Damaged   | 8          | 21        | 12        | 10         | 51  |
|                    |                      | Undamaged | 13         | 7         | 0         | 0          | 20  |
|                    | Gyeong-gi (GG)       | All       | 21         | 28        | 12        | 10         | 71  |
|                    |                      | Damaged   | 1          | 9         | 9         | 6          | 25  |
|                    |                      | Undamaged | 20         | 19        | 3         | 4          | 46  |
|                    | Gang-won (GW)        | All       | 21         | 28        | 12        | 10         | 71  |
|                    |                      | Damaged   | 2          | 9         | 7         | 4          | 22  |
|                    |                      | Undamaged | 19         | 19        | 5         | 6          | 49  |
|                    | Chung-cheong (CC)    | All       | 21         | 28        | 12        | 10         | 71  |
|                    |                      | Damaged   | 2          | 9         | 6         | 8          | 25  |
|                    |                      | Undamaged | 19         | 19        | 6         | 2          | 46  |
|                    | Jolla (JL)           | All       | 21         | 28        | 12        | 10         | 71  |
|                    |                      | Damaged   | 5          | 17        | 10        | 9          | 41  |
|                    |                      | Undamaged | 16         | 11        | 2         | 1          | 30  |
|                    | Gyeong-sang (GS)     | All       | 21         | 28        | 12        | 10         | 71  |
|                    |                      | Damaged   | 7          | 21        | 10        | 9          | 47  |
|                    |                      | Undamaged | 14         | 7         | 2         | 1          | 24  |
|                    | Sum of province data | All       | 105        | 140       | 60        | 50         | 355 |
|                    |                      | Damaged   | 17         | 65        | 42        | 36         | 160 |
|                    |                      | Undamaged | 88         | 75        | 18        | 14         | 195 |

**Supplementary Table 3: List of the grouped tropical cyclones that made landfall over South Korea during 1979 – 2010.**

| Year             | East-short     | East-long                        | West-long      | West-short |
|------------------|----------------|----------------------------------|----------------|------------|
| 1979             |                |                                  | IRVING         | JUDY       |
| 1980             |                | ORCHID                           |                | JUNE       |
| 1981             |                |                                  |                | AGNES      |
| 1982             | KEN            | BESS, ELLIS                      | CECIL          |            |
| 1983             |                |                                  |                | FORREST    |
| 1984             | ED             | HOLLY                            |                |            |
| /1985            | ODESSA         | PAT                              | JEFF, KIT, LEE | BRENDA     |
| 1986             |                |                                  | VERA           | NANCY      |
| 1987             |                | DINAH                            | THELMA         |            |
| 1988             |                |                                  |                |            |
| 1989             | ELLIS, JUDY    |                                  |                |            |
| 1990             | FLO            | ZOLA                             |                | ROBYN      |
| 1991             | GLADYS, noname | CAITLIN, KINNA,<br>MIREILLE      |                |            |
| 1992             | IRVING, KENT   | JANIS                            | TED            |            |
| 1993             | NATHAN, OFELIA | PERCY, ROBYN,<br>YANCY           |                |            |
| 1994             | WALT           | BRENDAN                          | ELLIE, SETH    | DOUG       |
| 1995             |                | FAYE, RYAN                       |                |            |
| 1996             | EVE            | KIRK                             |                |            |
| 1997             | ROSIE, OLIWA   | PETER                            | TINA           |            |
| 1998             | ZEB            |                                  |                | YANNI      |
| 1999             | PAUL           | BART                             | OLGA           | NEIL, ANN  |
| 2000             | BOLAVEN        |                                  | PRAPIROON      | SAOMAI     |
| 2001             |                |                                  |                |            |
| 2002             |                |                                  | RAMMASUN       | RUSA       |
| 2003             | LINFA          | MAEMI                            | SOUDELOR       |            |
| 2004             |                | NAMTHEUN, MEGI,<br>CHABA, SONGDA |                | MINDULLE   |
| 2005             |                | NABI                             |                | KHANUN     |
| 2006             | WUKONG         | SHANSHAN                         |                | EWINIAR    |
| 2007             | MAN-YI         | USAGI                            | NARI           |            |
| 2008             |                |                                  |                |            |
| 2009             |                |                                  |                |            |
|                  |                | DIANMU, KOMPASU,                 |                |            |
| 2010             |                | MALOU                            |                |            |
| Number of<br>TCs | 22             | 31                               | 16             | 16         |

### In-situ observation based decision tree

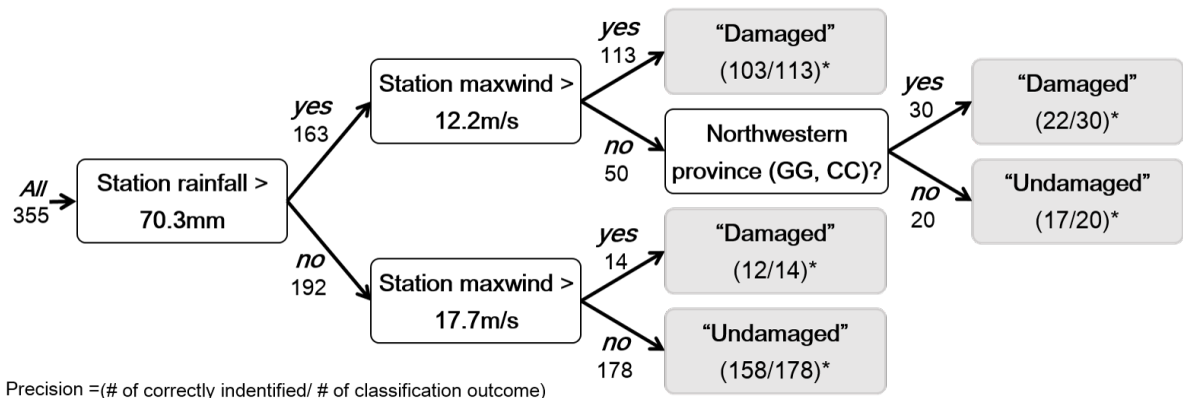

**Supplementary Figure 1: Decision tree model for damage occurrence using two in-situ station observations (precipitation and surface wind) as input variables instead of TC best-track information attributes (intensity, size, and track).** The number of cases corresponding to each criterion is presented along each arrow. The shaded boxes indicate the final diagnosis boxes, in which the precision of the diagnosis is written in parentheses (the number of correctly identified cases / the number of cases diagnosed following the specific sequence of criteria).
